# Supplementary material for: Transcriptome Analysis in Patients with Chronic Kidney Disease on Hemodialysis Disclosing a Key Role for CD16+CX3CR1+ Monocytes
Source: PubMed Central journal article supplement (PMC4382044; doi:10.1371/journal.pone.0121750), 2015-04-01
Supplement: pone.0121750.s002.pdf [file pone.0121750.s002.pdf]

**Control vs CVE**

| Symbol   | Gene name                                                                                           | FC   | p-value | FDR   |
|----------|-----------------------------------------------------------------------------------------------------|------|---------|-------|
| ANKFY1_2 | ankyrin repeat and FYVE domain containing 1                                                         | 0,50 | 0,030   | 0,644 |
| AVPR1B   | arginine vasopressin receptor 1B                                                                    | 1,51 | 0,041   | 0,644 |
| CCL17    | chemokine (C-C motif) ligand 17                                                                     | 1,72 | 0,007   | 0,644 |
| CD209    | CD209 antigen                                                                                       | 0,55 | 0,027   | 0,644 |
| CD244    | CD244 natural killer cell receptor 2B4                                                              | 0,36 | 0,003   | 0,644 |
| CGGBP1   | CGG triplet repeat binding protein 1                                                                | 0,52 | 0,045   | 0,644 |
| CMIM2    | meteorin, glial cell differentiation regulator                                                      | 1,50 | 0,041   | 0,644 |
| CSF1_2   | colony stimulating factor 1 (macrophage)                                                            | 1,67 | 0,034   | 0,644 |
| CXCL3    | chemokine (C-X-C motif) ligand 3                                                                    | 1,69 | 0,041   | 0,644 |
| DDX6     | DEAD (Asp-Glu-Ala-Asp) box polypeptide 6                                                            | 0,54 | 0,009   | 0,644 |
| EDN2     | endothelin 2                                                                                        | 1,58 | 0,018   | 0,644 |
| EGFR_4   | epidermal growth factor receptor (erythroblastic leukemia viral (v-erb-b) oncogene homolog, avian)  | 0,59 | 0,018   | 0,644 |
| FCGR1A   | Fc fragment of IgG, high affinity Ia, receptor for (CD64)                                           | 0,46 | 0,034   | 0,644 |
| GLG1     | golgi apparatus protein 1                                                                           | 1,76 | 0,041   | 0,644 |
| ICOSL    | inducible T-cell co-stimulator ligand                                                               | 2,43 | 0,027   | 0,644 |
| LOC56267 | hypothetical protein 669                                                                            | 1,59 | 0,009   | 0,644 |
| MPO      | myeloperoxidase                                                                                     | 0,58 | 0,014   | 0,644 |
| NCOA3    | nuclear receptor coactivator 3                                                                      | 0,49 | 0,027   | 0,644 |
| NR4A1_1  | nuclear receptor subfamily 4, group A, member 1                                                     | 0,58 | 0,027   | 0,644 |
| NRP1     | neuropilin 1                                                                                        | 0,61 | 0,041   | 0,644 |
| PDGFA    | platelet-derived growth factor alpha polypeptide                                                    | 1,65 | 0,041   | 0,644 |
| PTGDR    | prostaglandin D2 receptor (DP)                                                                      | 0,47 | 0,034   | 0,644 |
| RUNX1    | runt-related transcription factor 1<br>(acute myeloid leukemia 1; aml1 oncogene)                    | 0,59 | 0,011   | 0,644 |
| SDHA     | succinate dehydrogenase complex, subunit A, flavoprotein (Fp)                                       | 0,62 | 0,009   | 0,644 |
| STK4     | serine/threonine kinase 4                                                                           | 1,68 | 0,041   | 0,644 |
| THRAP4   | thyroid hormone receptor associated protein 4                                                       | 0,60 | 0,041   | 0,644 |
| TIMP1    | tissue inhibitor of metalloproteinase 1<br>(erythroid potentiating activity, collagenase inhibitor) | 0,56 | 0,027   | 0,644 |

**Control vs CKD5HD**

| <b>Symbol</b> | <b>Gene name</b>                                                                                                                 | <b>FC</b> | <b>p-value</b> | <b>FDR</b> |
|---------------|----------------------------------------------------------------------------------------------------------------------------------|-----------|----------------|------------|
| ADORA1        | adenosine A1 receptor                                                                                                            | 2,00      | 0,045          | 0,827      |
| C10orf70      | chromosome 10 open reading frame 70                                                                                              | 0,58      | 0,006          | 0,587      |
| CASP8_E       | caspase 8, apoptosis-related cysteine protease                                                                                   | 0,51      | 0,001          | 0,535      |
| CD244         | CD244 natural killer cell receptor 2B4                                                                                           | 0,46      | 0,009          | 0,587      |
| CUL3          | cullin 3                                                                                                                         | 0,65      | 0,003          | 0,535      |
| CX3CR1        | chemokine (C-X3-C motif) receptor 1                                                                                              | 1,78      | 0,011          | 0,667      |
| GLA           | galactosidase, alpha                                                                                                             | 2,49      | 0,003          | 0,535      |
| IL2RG         | interleukin 2 receptor, gamma<br>(severe combined immunodeficiency)                                                              | 1,94      | 0,018          | 0,667      |
| IL8RA         | interleukin 8 receptor, alpha                                                                                                    | 2,41      | 0,022          | 0,667      |
| ITGB2         | integrin, beta 2 (antigen CD18 (p95), lymphocyte<br>function-associated antigen 1; macrophage<br>antigen 1 (mac-1) beta subunit) | 1,74      | 0,014          | 0,667      |
| MAD           | MAX dimerization protein 1                                                                                                       | 0,57      | 0,027          | 0,667      |
| NCOA3         | nuclear receptor coactivator 3                                                                                                   | 0,67      | 0,022          | 0,667      |
| OR10H3        | olfactory receptor, family 10, subfamily H, member 3                                                                             | 0,57      | 0,025          | 0,667      |
| TF            | transferrin                                                                                                                      | 0,48      | 0,003          | 0,535      |
| THRAP4        | thyroid hormone receptor associated protein 4                                                                                    | 0,60      | 0,008          | 0,587      |
| TNFRSF6       | tumor necrosis factor receptor superfamily, member 6                                                                             | 1,95      | 0,016          | 0,667      |
| TNFRSF7       | tumor necrosis factor receptor superfamily, member 7                                                                             | 0,55      | 0,037          | 0,827      |
| TPST1         | tyrosylprotein sulfotransferase 1                                                                                                | 0,59      | 0,025          | 0,667      |

**Control vs CKD5HD/CVE**

| <b>Symbol</b> | <b>Gene name</b>                                                                                               | <b>FC</b> | <b>p-value</b> | <b>FDR</b> |
|---------------|----------------------------------------------------------------------------------------------------------------|-----------|----------------|------------|
| ACTB          | actin, beta                                                                                                    | 1,92      | 0,022          | 0,287      |
| ADAMDEC1      | ADAM-like, decysin 1                                                                                           | 1,65      | 0,018          | 0,287      |
| ADORA3        | adenosine A3 receptor                                                                                          | 0,59      | 0,027          | 0,324      |
| AKNA          | AT-hook transcription factor AKNA                                                                              | 1,57      | 0,018          | 0,287      |
| AKT1          | v-akt murine thymoma viral oncogene homolog 1                                                                  | 0,41      | 0,009          | 0,287      |
| ALOX15        | arachidonate 15-lipoxygenase                                                                                   | 0,52      | 0,018          | 0,287      |
| AP1B1         | adaptor-related protein complex 1, beta 1 subunit                                                              | 1,60      | 0,004          | 0,287      |
| CAPG          | capping protein (actin filament), gelsolin-like                                                                | 1,59      | 0,022          | 0,310      |
| CCL17         | chemokine (C-C motif) ligand 17                                                                                | 1,60      | 0,022          | 0,310      |
| CCNL1         | cyclin L1                                                                                                      | 1,53      | 0,022          | 0,310      |
| CD244         | CD244 natural killer cell receptor 2B4                                                                         | 0,63      | 0,007          | 0,287      |
| CD37          | CD37 antigen                                                                                                   | 1,52      | 0,002          | 0,267      |
| CD44          | CD44 antigen (homing function and Indian blood group system)                                                   | 1,57      | 0,014          | 0,287      |
| CDKN1A        | cyclin-dependent kinase inhibitor 1A (p21, Cip1)                                                               | 2,19      | 0,001          | 0,267      |
| CGGBP1        | CGG triplet repeat binding protein 1                                                                           | 0,54      | 0,010          | 0,287      |
| CLECSF14      | C-type (calcium dependent, carbohydrate-recognition domain) lectin, superfamily member 14 (macrophage-derived) | 0,60      | 0,034          | 0,333      |
| CSF1_2        | colony stimulating factor 1 (macrophage)                                                                       | 1,76      | 0,018          | 0,287      |
| CTSC_1        | cathepsin C                                                                                                    | 1,67      | 0,007          | 0,287      |
| CTSC_2        | cathepsin C                                                                                                    | 1,54      | 0,027          | 0,324      |
| CUL3          | cullin 3                                                                                                       | 0,61      | 0,011          | 0,287      |
| CX3CR1        | chemokine (C-X3-C motif) receptor 1                                                                            | 1,73      | 0,041          | 0,343      |
| CXXC1         | CXXC finger 1 (PHD domain)                                                                                     | 1,50      | 0,014          | 0,287      |
| DKFZP564J157  | DKFZp564J157 protein                                                                                           | 1,63      | 0,011          | 0,287      |
| EIF4E         | eukaryotic translation initiation factor 4E                                                                    | 0,46      | 0,010          | 0,287      |
| FCGR3A        | Fc fragment of IgG, low affinity IIIa, receptor for (CD16)                                                     | 1,91      | 0,022          | 0,310      |
| FCGR3B        | Fc fragment of IgG, low affinity IIIb, receptor for (CD16)                                                     | 1,67      | 0,007          | 0,287      |
| FTH1          | ferritin, heavy polypeptide 1                                                                                  | 1,51      | 0,027          | 0,324      |
| GLA           | galactosidase, alpha                                                                                           | 2,13      | 0,010          | 0,287      |
| GOSR2         | golgi SNAP receptor complex member 2                                                                           | 1,74      | 0,045          | 0,354      |
| HLA-A         | major histocompatibility complex, class I, A                                                                   | 1,72      | 0,041          | 0,343      |
| IL11RA        | interleukin 11 receptor, alpha                                                                                 | 2,24      | 0,003          | 0,267      |
| IL12B         | interleukin 12B (natural killer cell stimulatory factor 2, cytotoxic lymphocyte maturation factor 2, p40)      | 0,34      | 0,011          | 0,287      |
| IL2RG         | interleukin 2 receptor, gamma (severe combined immunodeficiency)                                               | 1,82      | 0,003          | 0,267      |
| ITGB4         | integrin, beta 4                                                                                               | 0,46      | 0,041          | 0,343      |
| LDHA          | lactate dehydrogenase A                                                                                        | 0,67      | 0,027          | 0,324      |
| LTA           | lymphotoxin alpha (TNF superfamily, member 1)                                                                  | 1,54      | 0,045          | 0,354      |
| MAD           | MAX dimerization protein 1                                                                                     | 0,50      | 0,009          | 0,287      |
| MMP15         | matrix metalloproteinase 15 (membrane-inserted)                                                                | 0,45      | 0,018          | 0,287      |
| MMP3          | matrix metalloproteinase 3 (stromelysin 1, progelatinase)                                                      | 0,67      | 0,034          | 0,333      |
| MMP9          | matrix metalloproteinase 9 (gelatinase B, 92kDa gelatinase, 92kDa type IV collagenase)                         | 0,59      | 0,011          | 0,287      |
| MSL3L1_4      | male-specific lethal 3-like 1 (Drosophila)                                                                     | 0,40      | 0,018          | 0,287      |
| NRP2_1        | neuropilin 2                                                                                                   | 1,54      | 0,045          | 0,354      |
| PDGFB         | platelet-derived growth factor beta polypeptide (simian sarcoma viral (v-sis) oncogene homolog)                | 0,62      | 0,002          | 0,267      |
| PMP22         | peripheral myelin protein 22                                                                                   | 0,42      | 0,018          | 0,287      |
| PPARD_1       | peroxisome proliferative activated receptor, delta                                                             | 0,66      | 0,006          | 0,287      |
| PPID          | peptidylprolyl isomerase D (cyclophilin D)                                                                     | 0,60      | 0,003          | 0,267      |
| PPP5C         | protein phosphatase 5, catalytic subunit                                                                       | 1,89      | 0,037          | 0,343      |
| PSCD1         | pleckstrin homology, Sec7 and coiled-coil domains 1 (cytohesin 1)                                              | 1,52      | 0,025          | 0,310      |

|         |                                                                                       |      |       |       |
|---------|---------------------------------------------------------------------------------------|------|-------|-------|
| SFRP5   | secreted frizzled-related protein 5                                                   | 1,79 | 0,030 | 0,333 |
| SN      | sialoadhesin                                                                          | 0,61 | 0,027 | 0,324 |
| SPINT2  | serine protease inhibitor, Kunitz type, 2                                             | 1,54 | 0,041 | 0,343 |
| STAT1_b | signal transducer and activator of transcription 1, 91kDa                             | 1,95 | 0,009 | 0,287 |
| STAT6   | signal transducer and activator of transcription 6, interleukin-4 induced             | 1,53 | 0,041 | 0,343 |
| TEGT    | testis enhanced gene transcript (BAX inhibitor 1)                                     | 1,55 | 0,027 | 0,324 |
| TF      | transferrin                                                                           | 0,60 | 0,027 | 0,324 |
| TIMP3   | tissue inhibitor of metalloproteinase 3 (Sorsby fundus dystrophy, pseudoinflammatory) | 1,88 | 0,011 | 0,287 |
| TNFSF8  | tumor necrosis factor (ligand) superfamily, member 8                                  | 1,58 | 0,045 | 0,354 |
| USP18   | ubiquitin specific protease 18                                                        | 0,66 | 0,014 | 0,287 |

**CVE vs CKD5HD**

| <b>Symbol</b> | <b>Gene name</b>                                                                                                           | <b>FC</b> | <b>p-value</b> | <b>FDR</b> |
|---------------|----------------------------------------------------------------------------------------------------------------------------|-----------|----------------|------------|
| ANKFY1_2      | ankyrin repeat and FYVE domain containing 1                                                                                | 1,72      | 0,026          | 0,536      |
| BCL6          | B-cell CLL/lymphoma 6 (zinc finger protein 51)                                                                             | 2,32      | 0,023          | 0,536      |
| C10orf70      | chromosome 10 open reading frame 70                                                                                        | 0,67      | 0,010          | 0,535      |
| C11orf1       | chromosome 11 open reading frame 1                                                                                         | 0,60      | 0,049          | 0,537      |
| CASP5         | caspase 5, apoptosis-related cysteine protease                                                                             | 1,53      | 0,005          | 0,535      |
| CD209         | CD209 antigen                                                                                                              | 2,11      | 0,013          | 0,535      |
| CDH1          | cadherin 1, type 1, E-cadherin (epithelial)                                                                                | 1,82      | 0,019          | 0,536      |
| CLECSF12_1    | C-type (calcium dependent, carbohydrate-recognition domain) lectin, superfamily member 12                                  | 0,58      | 0,023          | 0,536      |
| CX3CR1        | chemokine (C-X3-C motif) receptor 1                                                                                        | 1,58      | 0,049          | 0,537      |
| DDX6          | DEAD (Asp-Glu-Ala-Asp) box polypeptide 6                                                                                   | 1,71      | 0,023          | 0,536      |
| EPHA1         | EphA1                                                                                                                      | 1,72      | 0,013          | 0,535      |
| EVI5          | ecotropic viral integration site 5                                                                                         | 0,52      | 0,028          | 0,537      |
| EVL           | Enah/Vasp-like                                                                                                             | 1,51      | 0,014          | 0,536      |
| FCGR3A        | Fc fragment of IgG, low affinity IIIa, receptor for (CD16)                                                                 | 2,14      | 0,023          | 0,536      |
| FCGR3B        | Fc fragment of IgG, low affinity IIIb, receptor for (CD16)                                                                 | 1,53      | 0,008          | 0,535      |
| FGFR1_8       | fibroblast growth factor receptor 1 (fms-related tyrosine kinase 2, Pfeiffer syndrome)                                     | 1,90      | 0,034          | 0,537      |
| GADD45B       | growth arrest and DNA-damage-inducible, beta                                                                               | 1,66      | 0,049          | 0,537      |
| GLA           | galactosidase, alpha                                                                                                       | 1,74      | 0,031          | 0,537      |
| GLG1          | golgi apparatus protein 1                                                                                                  | 0,58      | 0,004          | 0,535      |
| HLA-A         | major histocompatibility complex, class I, A                                                                               | 1,70      | 0,019          | 0,536      |
| HLA-DRB5      | major histocompatibility complex, class II, DR beta 5                                                                      | 1,77      | 0,010          | 0,535      |
| IFNGR1        | interferon gamma receptor 1                                                                                                | 1,69      | 0,034          | 0,537      |
| INHBA         | inhibin, beta A (activin A, activin AB alpha polypeptide)                                                                  | 1,65      | 0,045          | 0,537      |
| ITGB2         | integrin, beta 2 (antigen CD18 (p95), lymphocyte function-associated antigen 1; macrophage antigen 1 (mac-1) beta subunit) | 1,85      | 0,001          | 0,535      |
| LOC374747     | similar to coenzyme A diphosphatase                                                                                        | 0,54      | 0,016          | 0,536      |
| MAPK14_3      | mitogen-activated protein kinase 14                                                                                        | 0,59      | 0,003          | 0,535      |
| NFATC1_2      | nuclear factor of activated T-cells, cytoplasmic, calcineurin-dependent 1                                                  | 1,93      | 0,017          | 0,536      |
| NFKBIA        | nuclear factor of kappa light polypeptide gene enhancer in B-cells inhibitor, alpha                                        | 2,13      | 0,003          | 0,535      |
| PLA2G4A       | phospholipase A2, group IVA (cytosolic, calcium-dependent)                                                                 | 1,56      | 0,034          | 0,537      |
| PTGIR         | prostaglandin I2 (prostacyclin) receptor (IP)                                                                              | 1,85      | 0,041          | 0,537      |
| SEMA4A        | hypothetical protein FLJ12287 similar to semaphorins                                                                       | 1,56      | 0,041          | 0,537      |
| SGK           | serum/glucocorticoid regulated kinase                                                                                      | 1,68      | 0,049          | 0,537      |
| STK4          | serine/threonine kinase 4                                                                                                  | 0,49      | 0,010          | 0,535      |
| TLR1          | toll-like receptor 1                                                                                                       | 1,53      | 0,031          | 0,537      |
| TNFRSF11A     | tumor necrosis factor receptor superfamily, member 11a, activator of NFkB                                                  | 0,66      | 0,041          | 0,537      |
| TNFRSF5       | tumor necrosis factor receptor superfamily, member 5                                                                       | 0,58      | 0,019          | 0,536      |
| TNFSF6        | tumor necrosis factor receptor superfamily, member 6                                                                       | 0,58      | 0,041          | 0,537      |

**CVE vs CKD5HD/CVE**

| <b>Symbol</b> | <b>Gene name</b>                                                                                                | <b>FC</b> | <b>p-value</b> | <b>FDR</b> |
|---------------|-----------------------------------------------------------------------------------------------------------------|-----------|----------------|------------|
| ACTB          | actin, beta                                                                                                     | 1,78      | 0,003          | 0,182      |
| ADORA3        | adenosine A3 receptor                                                                                           | 0,64      | 0,005          | 0,182      |
| AK2_A         | adenylate kinase 2                                                                                              | 1,86      | 0,023          | 0,209      |
| AK2_B         | adenylate kinase 2                                                                                              | 1,88      | 0,014          | 0,188      |
| AK3           | adenylate kinase 3                                                                                              | 2,11      | 0,011          | 0,188      |
| ALOX15        | arachidonate 15-lipoxygenase                                                                                    | 0,53      | 0,008          | 0,182      |
| BCL6          | B-cell CLL/lymphoma 6 (zinc finger protein 51)                                                                  | 2,48      | 0,016          | 0,189      |
| BMP2K_1       | BMP2 inducible kinase                                                                                           | 1,67      | 0,013          | 0,188      |
| C11orf1       | chromosome 11 open reading frame 1                                                                              | 0,57      | 0,019          | 0,200      |
| CAPG          | capping protein (actin filament), gelsolin-like                                                                 | 1,74      | 0,002          | 0,182      |
| CASP5         | caspase 5, apoptosis-related cysteine protease                                                                  | 1,68      | 0,004          | 0,182      |
| CASP7         | caspase 7, apoptosis-related cysteine protease                                                                  | 1,56      | 0,011          | 0,188      |
| CCL25         | chemokine (C-C motif) ligand 25                                                                                 | 1,92      | 0,028          | 0,223      |
| CCNL1         | cyclin L1                                                                                                       | 1,71      | 0,005          | 0,182      |
| CCR3          | chemokine (C-C motif) receptor 3                                                                                | 2,74      | 0,002          | 0,182      |
| CD209         | CD209 antigen                                                                                                   | 1,96      | 0,038          | 0,259      |
| CD244         | CD244 natural killer cell receptor 2B4                                                                          | 1,73      | 0,019          | 0,200      |
| CD4           | CD4 antigen (p55)                                                                                               | 1,88      | 0,007          | 0,182      |
| CD44          | CD44 antigen (homing function and Indian blood group system)                                                    | 1,51      | 0,004          | 0,182      |
| CDKN1A        | cyclin-dependent kinase inhibitor 1A (p21, Cip1)                                                                | 1,77      | 0,001          | 0,182      |
| CLECSF14      | C-type (calcium dependent, carbohydrate-recognition domain) lectin, superfamily member 14 (macrophage -derived) | 0,52      | 0,004          | 0,182      |
| CTSB          | cathepsin B                                                                                                     | 2,00      | 0,023          | 0,209      |
| CTSC_1        | cathepsin C                                                                                                     | 1,68      | 0,028          | 0,223      |
| CTSC_2        | cathepsin C                                                                                                     | 1,71      | 0,028          | 0,223      |
| CX3CR1        | chemokine (C-X3-C motif) receptor 1                                                                             | 1,53      | 0,049          | 0,287      |
| CYBB          | cytochrome b-245, beta polypeptide (chronic granulomatous disease)                                              | 1,76      | 0,023          | 0,209      |
| DDX6          | DEAD (Asp-Glu-Ala-Asp) box polypeptide 6                                                                        | 1,67      | 0,023          | 0,209      |
| DKFZP564J157  | DKFZp564J157 protein                                                                                            | 1,80      | 0,023          | 0,209      |
| EEF1A1        | eukaryotic translation elongation factor 1 alpha 1                                                              | 1,61      | 0,034          | 0,249      |
| FCGR2A        | Fc fragment of IgG, low affinity IIa, receptor for (CD32)                                                       | 1,64      | 0,023          | 0,209      |
| FCGR3A        | Fc fragment of IgG, low affinity IIIa, receptor for (CD16)                                                      | 2,73      | 0,005          | 0,182      |
| FCGR3B        | Fc fragment of IgG, low affinity IIIb, receptor for (CD16)                                                      | 1,86      | 0,001          | 0,182      |
| FTH1          | ferritin, heavy polypeptide 1                                                                                   | 1,61      | 0,001          | 0,182      |
| GADD45B       | growth arrest and DNA-damage-inducible, beta                                                                    | 1,68      | 0,001          | 0,182      |
| GOSR2         | golgi SNAP receptor complex member 2                                                                            | 1,85      | 0,014          | 0,188      |
| HLA-A         | major histocompatibility complex, class I, A                                                                    | 1,94      | 0,003          | 0,182      |
| HMGA2         | high mobility group AT-hook 2                                                                                   | 0,65      | 0,008          | 0,182      |
| IFIX          | interferon-inducible protein X                                                                                  | 0,67      | 0,041          | 0,259      |
| IL12B         | interleukin 12B (natural killer cell stimulatory factor 2, cytotoxic lymphocyte maturation factor 2, p40)       | 0,33      | 0,019          | 0,200      |
| IL6ST         | interleukin 6 signal transducer (gp130, oncostatin M receptor)                                                  | 2,49      | 0,002          | 0,182      |
| INHBA         | inhibin, beta A (activin A, activin AB alpha polypeptide)                                                       | 1,75      | 0,045          | 0,280      |
| IRF4          | interferon regulatory factor 4                                                                                  | 0,53      | 0,038          | 0,259      |
| ITGB4         | integrin, beta 4                                                                                                | 0,46      | 0,023          | 0,209      |
| IVD           | isovaleryl Coenzyme A dehydrogenase                                                                             | 1,59      | 0,016          | 0,189      |
| LOC374747     | similar to coenzyme A diphosphatase                                                                             | 0,54      | 0,008          | 0,182      |
| LTB4R         | leukotriene B4 receptor                                                                                         | 1,97      | 0,041          | 0,259      |
| MAD           | MAX dimerization protein 1                                                                                      | 0,65      | 0,010          | 0,188      |
| MAPK14_3      | mitogen-activated protein kinase 14                                                                             | 0,59      | 0,006          | 0,182      |
| MMP14         | matrix metalloproteinase 14 (membrane-inserted)                                                                 | 0,63      | 0,001          | 0,182      |
| MMP15         | matrix metalloproteinase 15 (membrane-inserted)                                                                 | 0,40      | 0,016          | 0,189      |

|           |                                                                                                  |      |       |       |
|-----------|--------------------------------------------------------------------------------------------------|------|-------|-------|
| MMP9      | matrix metalloproteinase 9 (gelatinase B, 92kDa gelatinase, 92kDa type IV collagenase)           | 0,63 | 0,041 | 0,259 |
| MSL3L1_4  | male-specific lethal 3-like 1 (Drosophila)                                                       | 0,42 | 0,028 | 0,223 |
| NFATC1_2  | nuclear factor of activated T-cells, cytoplasmic, calcineurin-dependent 1                        | 1,68 | 0,013 | 0,188 |
| NFATC2    | nuclear factor of activated T-cells, cytoplasmic, calcineurin-dependent 2                        | 0,64 | 0,010 | 0,188 |
| NFKBIA    | nuclear factor of kappa light polypeptide gene enhancer in B-cells inhibitor, alpha              | 1,60 | 0,049 | 0,287 |
| NKX2-8    | NK2 transcription factor related, locus 8 (Drosophila)                                           | 2,33 | 0,041 | 0,259 |
| NRP2_1    | neuropilin 2                                                                                     | 1,59 | 0,028 | 0,223 |
| PDCD1LG2  | programmed cell death 1 ligand 2                                                                 | 1,52 | 0,028 | 0,223 |
| PLA2G4A   | phospholipase A2, group IVA (cytosolic, calcium-dependent)                                       | 1,66 | 0,023 | 0,209 |
| PLAT      | plasminogen activator, tissue                                                                    | 0,65 | 0,019 | 0,200 |
| PLEC1     | plectin 1, intermediate filament binding protein 500kDa                                          | 0,64 | 0,028 | 0,223 |
| PSAP      | prosaposin (variant Gaucher disease and variant metachromatic leukodystrophy)                    | 1,88 | 0,034 | 0,249 |
| PSCD1     | pleckstrin homology, Sec7 and coiled-coil domains 1 (cytohesin 1)                                | 2,05 | 0,007 | 0,182 |
| PTGES2    | prostaglandin E synthase 2                                                                       | 1,91 | 0,034 | 0,249 |
| PTGIR     | prostaglandin I2 (prostacyclin) receptor (IP)                                                    | 1,86 | 0,013 | 0,188 |
| RAP2B     | RAP2B, member of RAS oncogene family                                                             | 1,64 | 0,041 | 0,259 |
| RUNX1     | runt-related transcription factor 1 (acute myeloid leukemia 1; aml1 oncogene)                    | 1,55 | 0,038 | 0,259 |
| S100A8    | S100 calcium binding protein A8 (calgranulin A)                                                  | 2,17 | 0,013 | 0,188 |
| SEMA4A    | hypothetical protein FLJ12287 similar to semaphorins                                             | 1,73 | 0,013 | 0,188 |
| SGK       | serum/glucocorticoid regulated kinase                                                            | 1,66 | 0,023 | 0,209 |
| SLAMF1    | signaling lymphocytic activation molecule family member 1                                        | 1,77 | 0,031 | 0,249 |
| SN        | sialoadhesin                                                                                     | 0,57 | 0,019 | 0,200 |
| SRC       | v-src sarcoma (Schmidt-Ruppin A-2) viral oncogene homolog (avian)                                | 1,71 | 0,031 | 0,241 |
| STAT1_b   | signal transducer and activator of transcription 1, 91kDa                                        | 2,30 | 0,003 | 0,182 |
| STAT6     | signal transducer and activator of transcription 6, interleukin-4 induced                        | 1,63 | 0,038 | 0,259 |
| STK4      | serine/threonine kinase 4                                                                        | 0,45 | 0,010 | 0,188 |
| TBX21     | T-box 21                                                                                         | 1,79 | 0,014 | 0,189 |
| TCEB2     | transcription elongation factor B (SIII), polypeptide 2 (18kDa, elongin B)                       | 2,23 | 0,010 | 0,188 |
| TEGT      | testis enhanced gene transcript (BAX inhibitor 1)                                                | 1,65 | 0,007 | 0,182 |
| TIMP1     | tissue inhibitor of metalloproteinase 1 (erythroid potentiating activity, collagenase inhibitor) | 1,75 | 0,016 | 0,189 |
| TIMP3     | tissue inhibitor of metalloproteinase 3 (Sorsby fundus dystrophy, pseudoinflammatory)            | 1,88 | 0,008 | 0,182 |
| TNFRSF11A | tumor necrosis factor receptor superfamily, member 11a, activator of NFKB                        | 0,66 | 0,034 | 0,249 |
| TNFRSF5   | tumor necrosis factor receptor superfamily, member 5                                             | 0,54 | 0,049 | 0,287 |
| YWHAZ     | tyrosine 3-monooxygenase/tryptophan 5-monooxygenase activation protein, zeta polypeptide         | 1,72 | 0,003 | 0,182 |
| ZNF9      | zinc finger protein 9 (a cellular retroviral nucleic acid binding protein)                       | 1,51 | 0,004 | 0,182 |

**CKD5HD vs CKD5HD/CVE**

| <b>Symbol</b> | <b>Gene name</b>                                                                      | <b>FC</b> | <b>p-value</b> | <b>FDR</b> |
|---------------|---------------------------------------------------------------------------------------|-----------|----------------|------------|
| ATF3          | activating transcription factor 3                                                     | 1,53      | 0,034          | 1,000      |
| ATP6V1A       | ATPase, H <sup>+</sup> transporting, lysosomal 70kDa, V1 subunit A                    | 1,88      | 0,026          | 1,000      |
| BMP2K_1       | BMP2 inducible kinase                                                                 | 1,66      | 0,045          | 1,000      |
| CDKN1A        | cyclin-dependent kinase inhibitor 1A (p21, Cip1)                                      | 1,69      | 0,002          | 1,000      |
| CTSB          | cathepsin B                                                                           | 1,75      | 0,034          | 1,000      |
| CTSC_1        | cathepsin C                                                                           | 2,12      | 0,005          | 1,000      |
| CTSC_2        | cathepsin C                                                                           | 1,97      | 0,013          | 1,000      |
| IL11RA        | interleukin 11 receptor, alpha                                                        | 1,87      | 0,031          | 1,000      |
| LAT           | linker for activation of T cells                                                      | 0,51      | 0,021          | 1,000      |
| PBX2          | pre-B-cell leukemia transcription factor 2                                            | 1,61      | 0,023          | 1,000      |
| PSCD1         | pleckstrin homology, Sec7 and coiled-coil domains 1 (cytohesin 1)                     | 1,75      | 0,041          | 1,000      |
| SLAMF1        | signaling lymphocytic activation molecule family member 1                             | 1,59      | 0,045          | 1,000      |
| SRC           | v-src sarcoma (Schmidt-Ruppin A-2) viral oncogene homolog (avian)                     | 1,89      | 0,034          | 1,000      |
| TIMP3         | tissue inhibitor of metalloproteinase 3 (Sorsby fundus dystrophy, pseudoinflammatory) | 1,97      | 0,003          | 1,000      |
